# Supplementary material for: Development of a Pilot Literacy Scale to Assess Knowledge, Attitudes, and Behaviors towards Climate Change and Infectious Disease Dynamics in Suriname
Source: MDPI journal article supplement (doi:10.3390/ijerph20247178), 2023-12-14
Supplement: s1 [file s1]

**Table S1.** Classification of literacy items for our general climate change scale by domain (knowledge, attitude, or behavior).

| KNOWLEDGE                                                                           | ATTITUDE                                                                                                                     | BEHAVIOR                                                                                        |
|-------------------------------------------------------------------------------------|------------------------------------------------------------------------------------------------------------------------------|-------------------------------------------------------------------------------------------------|
| Climate change is mainly caused by humans.                                          | I believe that climate change has an effect on human health.                                                                 | I participate in activities related to reducing climate change effects to help the environment. |
| Science has shown that climate change is real.                                      | I believe that climate change has an effect on the environment.                                                              | I stay indoors during heatwaves.                                                                |
| Climate change will cause the world to become hotter.                               | I believe that climate change will negatively affect future generations                                                      | I try to keep my house as cool as possible during heatwaves.                                    |
| Hotter temperatures across the world will cause more heatwaves.                     | I believe that climate change can be avoided or reduced                                                                      | I have emergency supplies ready in case of a hurricane.                                         |
| Heatwaves will cause more heatstrokes and other heat-related illnesses.             | I would like to reduce the effects of climate change in my area.                                                             | I store water to use before a drought or other major weather event.                             |
| Droughts will become worse because of climate change.                               | I believe that heatwaves will happen more often in my area in the future.                                                    | I reduce the amount of water I use to water my yard or plants during droughts.                  |
| Climate change will cause more rainfall around the world.                           | I believe that droughts will become an issue in my area.                                                                     |                                                                                                 |
| Climate change will cause more extreme weather, like hurricanes.                    | I believe that my area will experience more extreme weather, like hurricanes, because of climate change.                     |                                                                                                 |
| Hurricanes will become worse because of climate change.                             | I am worried about sea level rise negatively affecting my community in the future.                                           |                                                                                                 |
| Climate change will cause sea levels to rise.                                       | I believe that there should be more climate change information and education for people in my community.                     |                                                                                                 |
| The warming of the oceans will negatively affect fish and other sea animals.        | I believe that the media should raise awareness about how people can protect themselves from consequences of climate change. |                                                                                                 |
| The warming of the oceans will make it harder for fishing businesses to make money. |                                                                                                                              |                                                                                                 |
| Climate change will negatively impact our ability to grow food.                     |                                                                                                                              |                                                                                                 |
| Climate change will make it more difficult to get access to food.                   |                                                                                                                              |                                                                                                 |

**Table S2.** Classification of literacy items for our infectious disease scale by domain (knowledge, attitude, or behavior).

| KNOWLEDGE                                                                                             | ATTITUDE                                                                                                                                | BEHAVIOR                                                                                               |
|-------------------------------------------------------------------------------------------------------|-----------------------------------------------------------------------------------------------------------------------------------------|--------------------------------------------------------------------------------------------------------|
| Areas that do not currently have disease-carrying mosquitoes may have these mosquitoes in the future. | I think there is a direct link between climate change and infectious disease transmission.                                              | I use mosquito nets over my beds while sleeping at home.                                               |
| Higher temperatures will increase the spread of infectious diseases.                                  | I am concerned that climate change is increasing the number of mosquitoes that carry infectious diseases in my area.                    | I use mosquito screens on the doors and windows of my home.                                            |
| Climate change will increase the chances of catching an infectious disease in warmer countries.       | I have noticed that dengue/Zika/chikungunya outbreaks are happening more often in my area.                                              | I remove any water from open containers around my home (flowerpots, vases, tires, other containers).   |
| Changes in rainfall patterns will increase the spread of infectious diseases.                         | I believe that my chances of getting dengue/Zika/chikungunya are greater than other people in my area.                                  | I remove things that can hold water outside my house (flowerpots, vases, tires, other containers).     |
| Mosquitoes prefer temperatures between 24 and 28 degrees Celsius.                                     | I feel responsible for preventing dengue/Zika/chikungunya in my area.                                                                   | I make sure my home's septic tank is properly covered.                                                 |
| Dengue/Zika/chikungunya are caused by viruses.                                                        | I think that current control programs offered by the government have been successful in reducing the number of mosquitoes in this area. | I have reported mosquitoes or mosquito larvae that I see near my house to the appropriate authorities. |
| Mosquitoes that can spread dengue/Zika/chikungunya bite more often in the daytime.                    | I believe that there should be more infectious disease information and education for people in my community.                            |                                                                                                        |
| There are more dengue/Zika/chikungunya outbreaks during rainy seasons.                                |                                                                                                                                         |                                                                                                        |

**Table S3.** Items retained for climate change and infectious disease literacy scale based on 80% or better percent agreement with an essential rating (initial review), or at least 67% percent agreement with an essential or useful but not essential rating (second review) across a panel of six expert reviewers. This left a total of 52 items for exploratory and confirmatory analyses.

|                                                                                                                           | Rating        | Percent Agreement |
|---------------------------------------------------------------------------------------------------------------------------|---------------|-------------------|
| <b>1. Climate change is mainly caused by humans.</b>                                                                      | Essential (E) | 100%              |
| <b>2. Science has shown that climate change is real.</b>                                                                  | Essential (E) | 83.3%             |
| <b>3. I believe that climate change has an effect on human health.</b>                                                    | Essential (E) | 100%              |
| <b>4. I believe that climate change has an effect on the environment.</b>                                                 | Essential (E) | 83.3%             |
| <b>5. I believe that climate change will negatively affect future generations.</b>                                        | Essential (E) | 83.3%             |
| <b>6. I believe that climate change can be prevented or avoided.</b>                                                      | Essential (E) | 100%              |
| <b>7. I think there is a direct link between climate change and infectious disease transmission.</b>                      | Essential (E) | 83.3%             |
| <b>8. Areas that do not currently have disease-carrying mosquitoes may have these mosquitoes in the future.</b>           | Essential (E) | 83.3%             |
| <b>9. I am concerned climate change is increasing the number of mosquitoes that carry infectious diseases in my area.</b> | Essential (E) | 83.3%             |
| <b>10. Climate change will cause the world to become hotter.</b>                                                          | Essential (E) | 83.3%             |
| <b>11. Higher temperatures will increase the spread of infectious diseases.</b>                                           | Essential (E) | 100%              |
| <b>12. Climate change will increase the chances of catching an infectious disease in warmer countries.</b>                | Essential (E) | 83.3%             |
| <b>13. Hotter temperatures across the world will cause more heatwaves.</b>                                                | Essential (E) | 83.3%             |
| <b>14. I believe that heatwaves will happen more often in my area.</b>                                                    | Essential (E) | 83.3%             |

|                                                                                                                     |                              |       |
|---------------------------------------------------------------------------------------------------------------------|------------------------------|-------|
| <b>15. Heatwaves will cause more heatstroke and other heat-related illnesses.</b>                                   | Essential (E)                | 83.3% |
| <b>16. I stay indoors during heatwaves.</b>                                                                         | Useful but not essential (U) | 67%   |
| <b>17. I keep my house as cool as possible during heatwaves.</b>                                                    | Useful but not essential (U) | 83.3% |
| <b>18. Droughts will become worse because of climate change.</b>                                                    | Essential (E)                | 100%  |
| <b>19. I believe that droughts will become an issue in my area.</b>                                                 | Essential (E)                | 83.3% |
| <b>20. I store water to use before a drought or other extreme weather event occurs.</b>                             | Useful but not essential (U) | 67%   |
| <b>21. I reduce the amount of water I use to water my yard or plants during droughts.</b>                           | Useful but not essential (E) | 67%   |
| <b>22. Climate change will cause more rainfall around the world.</b>                                                | Essential (E)                | 83.3% |
| <b>23. Changes in rainfall patterns will increase the spread of infectious diseases.</b>                            | Essential (E)                | 83.3% |
| <b>24. Climate change will cause more extreme weather, like hurricanes.</b>                                         | Essential (E)                | 100%  |
| <b>25. Hurricanes will become worse because of climate change.</b>                                                  | Essential (E)                | 100%  |
| <b>26. I believe that my area will experience more extreme weather, like hurricanes, because of climate change.</b> | Essential (E)                | 83.3% |
| <b>27. I have emergency supplies ready in case of a hurricane.</b>                                                  | Essential (E)                | 83.3% |
| <b>28. Climate change will cause sea levels to rise.</b>                                                            | Essential (E)                | 100%  |
| <b>29. I am worried about sea level rise negatively affecting my community.</b>                                     | Essential (E)                | 83.3% |
| <b>30. The warming of the oceans will negatively affect fish and other sea animals.</b>                             | Essential (E)                | 83.3% |
| <b>31. The warming of the oceans will make it harder for fishing businesses to make money.</b>                      | Useful but not essential (U) | 67%   |
| <b>32. Climate change will negatively impact our ability to grow food.</b>                                          | Essential (E)                | 83.3% |

|                                                                                                                                         |                              |       |
|-----------------------------------------------------------------------------------------------------------------------------------------|------------------------------|-------|
| <b>33. Climate change will make it harder to get access to food.</b>                                                                    | Essential (E)                | 83.3% |
| <b>34. I would like to reduce the effects of climate change in my area.</b>                                                             | Essential (E)                | 83.3% |
| <b>35. I participate in activities related to reducing climate change effects to help the environment.</b>                              | Essential (E)                | 83.3% |
| <b>36. I believe that there should be more climate change information and education for people in my community.</b>                     | Essential (E)                | 83.3% |
| <b>37. I believe that the media should raise awareness about how people can protect themselves from consequences of climate change.</b> | Essential (E)                | 83.3% |
| <b>38. Mosquitoes prefer temperatures between 24 and 28 degrees Celsius.</b>                                                            | Useful but not essential (U) | 83.3% |
| <b>39. Dengue/Zika/chikungunya are caused by viruses.</b>                                                                               | Useful but not essential (U) | 67%   |
| <b>40. Mosquitoes that can spread dengue/Zika/chikungunya bite more often in the daytime.</b>                                           | Useful but not essential (U) | 83.3% |
| <b>41. There are more dengue/Zika/chikungunya outbreaks during rainy seasons.</b>                                                       | Essential (E)                | 83.3% |
| <b>42. I have noticed that dengue/Zika/chikungunya outbreaks are happening more often in my area.</b>                                   | Useful but not essential (U) | 67%   |
| <b>43. I believe that my chances of getting dengue/Zika/chikungunya are greater than other people in my area.</b>                       | Useful but not essential (U) | 67%   |
| <b>44. I feel responsible for preventing dengue/Zika/chikungunya in my area.</b>                                                        | Useful but not essential (U) | 67%   |
| <b>45. I use mosquito nets over my beds while sleeping at home.</b>                                                                     | Essential (E)                | 83.3% |
| <b>46. I have mosquito screens on the doors and windows of my home.</b>                                                                 | Essential (E)                | 83.3% |

|                                                                                                                                                    |                              |       |
|----------------------------------------------------------------------------------------------------------------------------------------------------|------------------------------|-------|
| <b>47. I remove any water from open containers around my home (flowerpots, vases, tires, other containers).</b>                                    | Essential (E)                | 83.3% |
| <b>48. I remove things that can hold water outside my house (flowerpots, vases, tires, other containers).</b>                                      | Essential (E)                | 83.3% |
| <b>49. I make sure my home's septic tank is properly covered.</b>                                                                                  | Essential (E)                | 83.3% |
| <b>50. I have reported mosquitoes or mosquito larvae that I see near my house to the appropriate authorities.</b>                                  | Essential (E)                | 83.3% |
| <b>51. I think that current control programs offered by the government have been successful in reducing the number of mosquitoes in this area.</b> | Useful but not essential (U) | 67%   |
| <b>52. I believe that there should be more infectious disease information and education for people in my community.</b>                            | Essential                    | 83.3% |
